# Supplementary material for: High resolution cryo-EM structure of the helical RNA-bound Hantaan virus nucleocapsid reveals its assembly mechanisms
Source: eLife journal article supplement (doi:10.7554/elife.43075), 2019-01-14
Supplement: figures [file elife-43075-figures-v2.pdf]

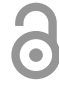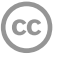

---

## Figures and figure supplements

High resolution cryo-EM structure of the helical RNA-bound Hantaan virus nucleocapsid reveals its assembly mechanisms

**Benoît Arragain et al**

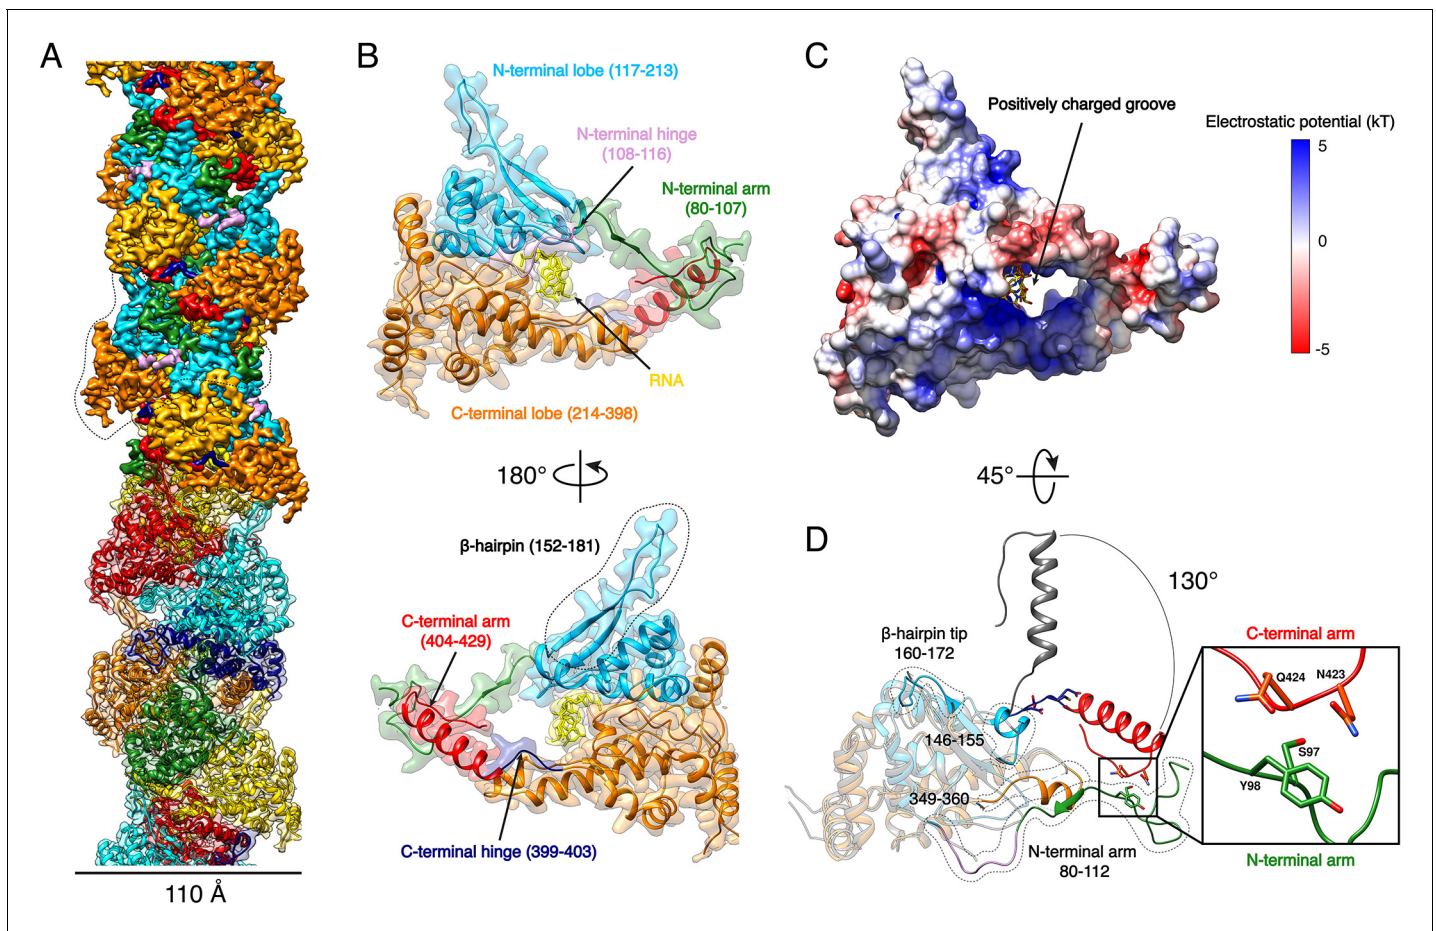

**Figure 1.** HTNV-NC structure. (A) HTNV-NC helical organisation. The upper part of the cryo-EM map is coloured per NP domain, whereas the lower part is shown as transparent and coloured per NP protomer. The NP surrounded by dotted lines corresponds to **Figure 1B** orientation. (B) Domain organisation of one monomer extracted from the NC helical assembly. Each domain is coloured as in **Figure 1A** upper part. The newly described  $\beta$ -hairpin (residues 152–181) is labelled and surrounded by dotted lines. (C) Electrostatic surface representation of HTNV-NP monomer. (D) Superimposition of monomeric NP<sub>core</sub> (Olal and Daumke, 2016) (in gray) and NP from the present structure (coloured as in **Figure 1A,B**). The Ct<sub>arm</sub> rotation is highlighted and newly built elements are labelled, shown as non-transparent and surrounded by dotted lines. A close up view of the Ct<sub>arm</sub>/Nt<sub>arm</sub> interaction is shown.

DOI: <https://doi.org/10.7554/eLife.43075.003>

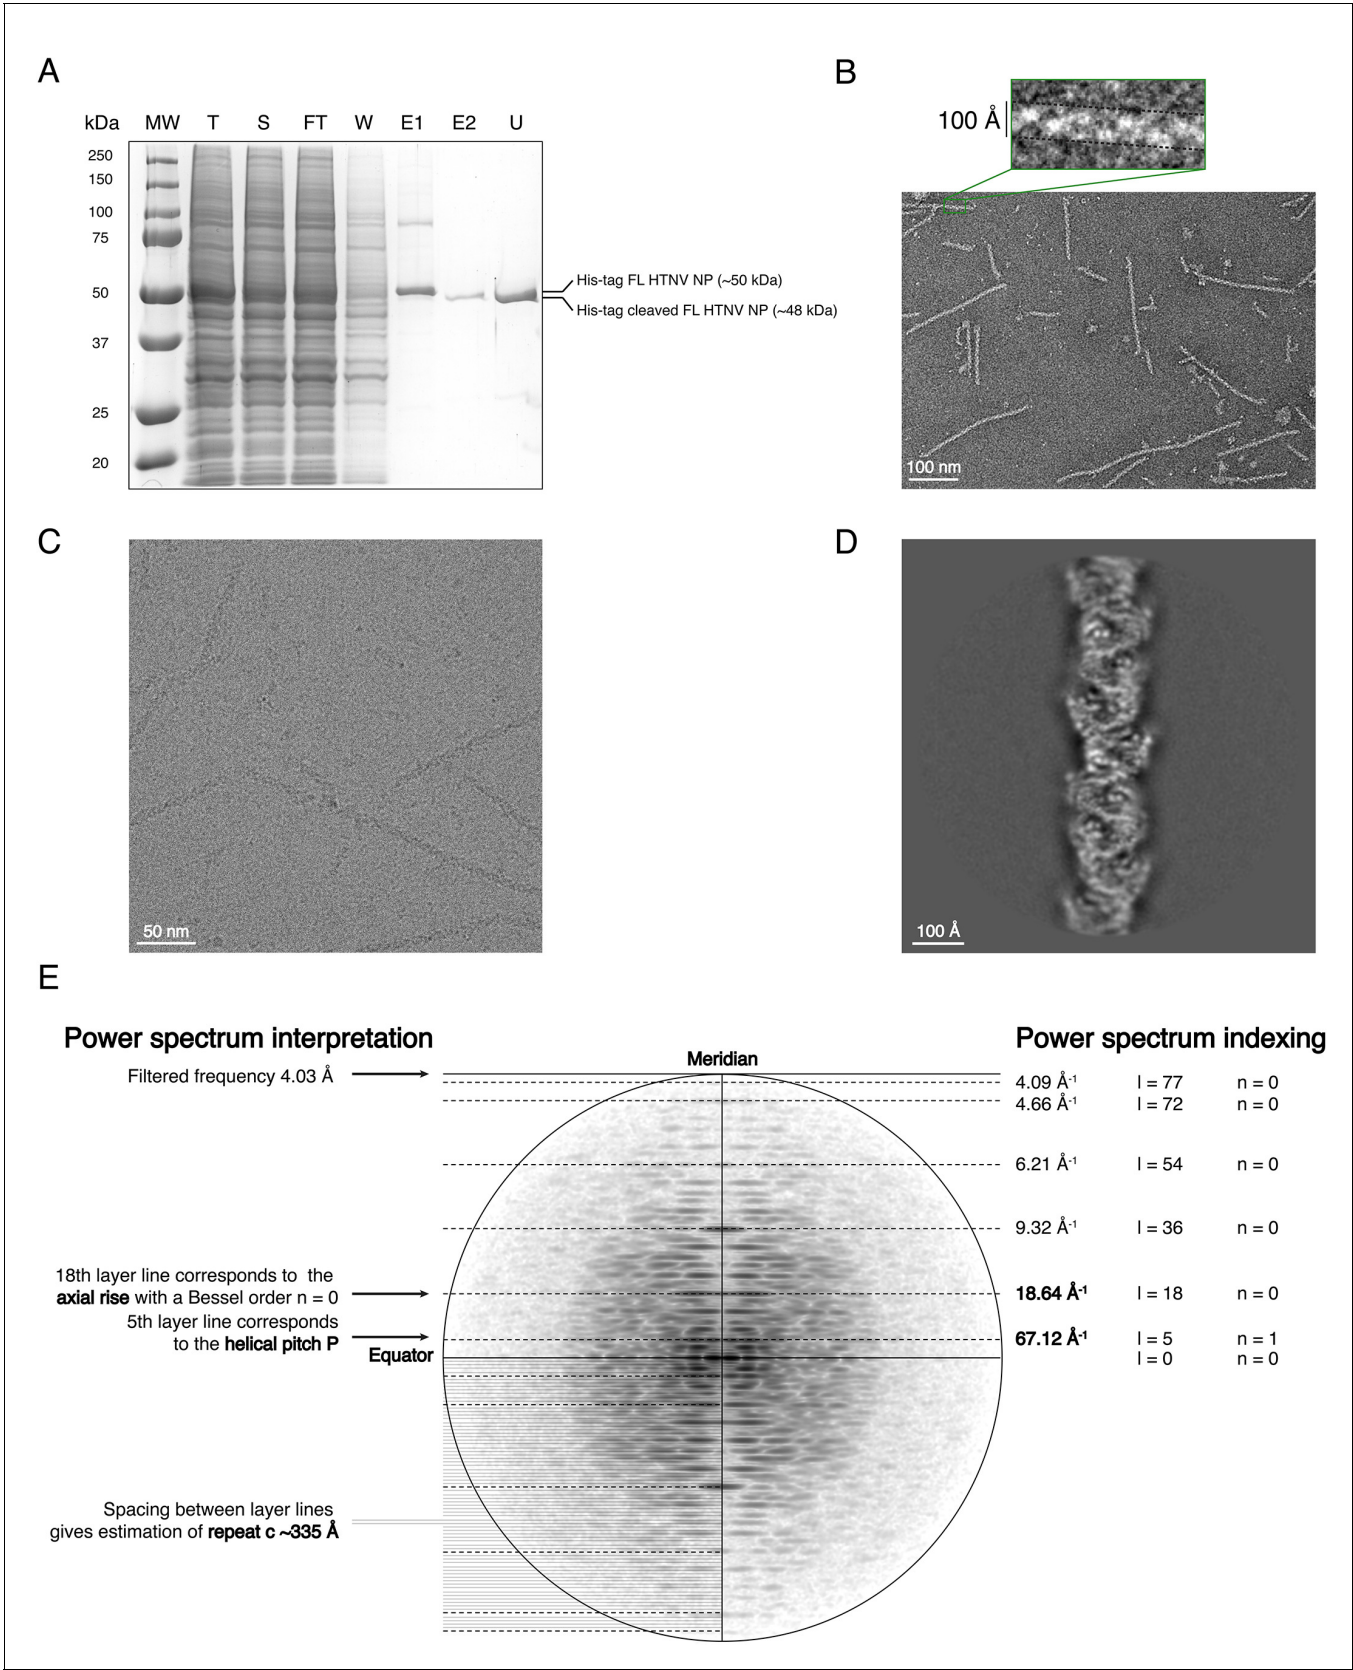

**Figure 1—figure supplement 1.** Purification, EM analysis and symmetry determination of HTNV-NC. (A) SDS-PAGE gel of HTNV-NC purification. T: total fraction, S: soluble fraction, FT: flow through of the 1<sup>st</sup> Ni-NTA purification, W: wash of the 1<sup>st</sup> Ni-NTA purification, E1: elution of the 1<sup>st</sup> Ni-NTA purification, E2: elution of the 2<sup>nd</sup> Ni-NTA purification, U: ultrafiltration. Figure 1—figure supplement 1 continued on next page

Figure 1—figure supplement 1 continued

purification, E2: supernatant after TEV cleavage and 2<sup>nd</sup> Ni-NTA purification, U: concentrated protein after ultra-centrifugation. (B,C) Negative stain (B) and cryo electron micrographs (C) of HTNV-NC. Scale bar is indicated. (D) 2D class average. (E) 2D class average power spectrum, indexing and interpretation enabling symmetry determination.

DOI: <https://doi.org/10.7554/eLife.43075.004>



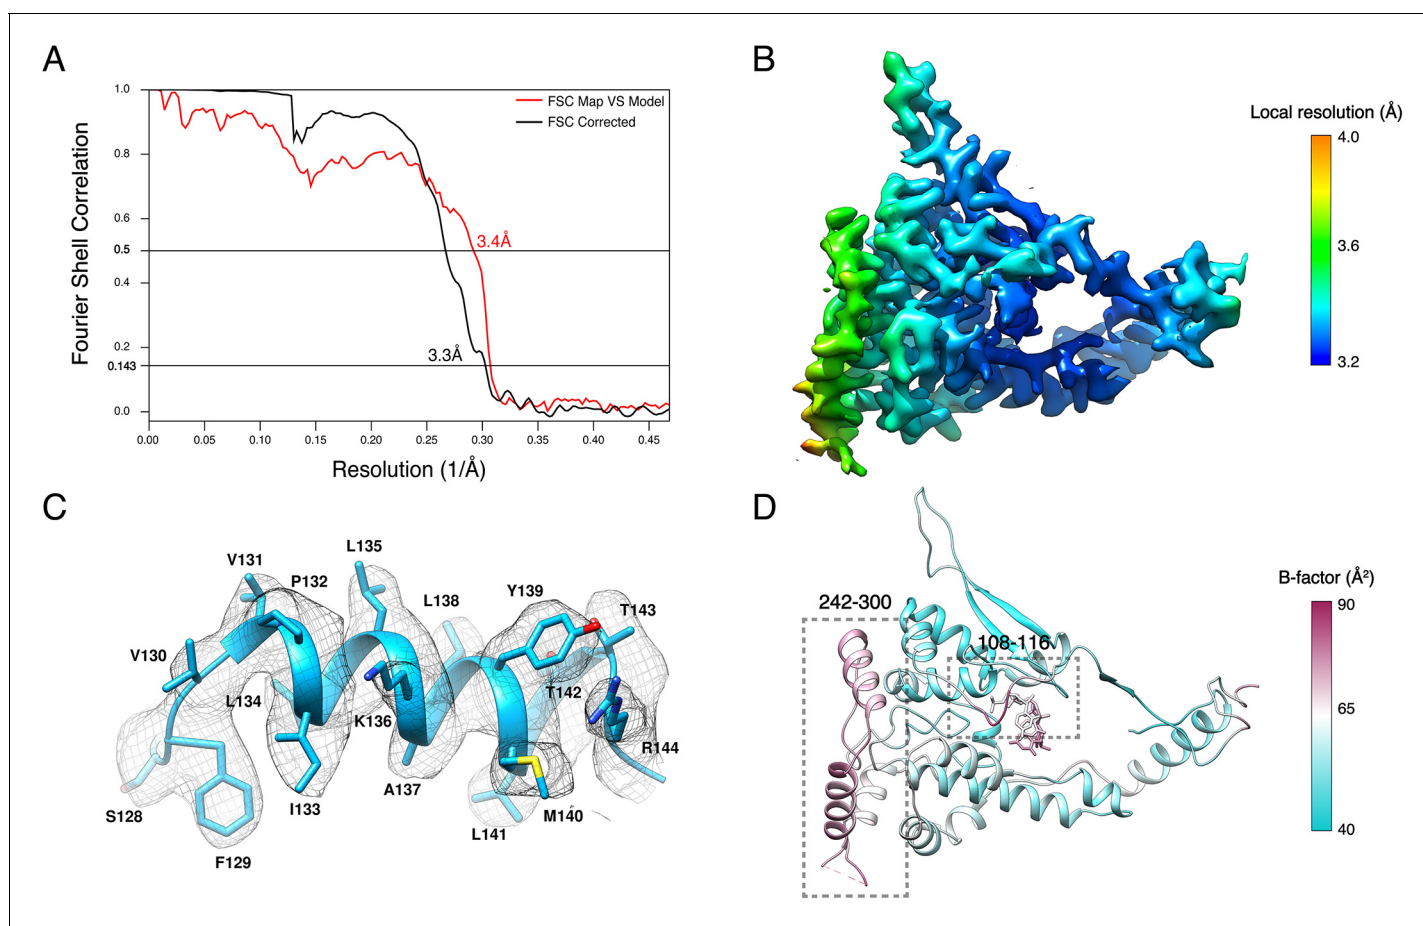

**Figure 1—figure supplement 2.** Resolution of HTNV-NC structure. (A) The gold-standard Fourier shell correlation (FSC) of masked map indicates a resolution of 3.3 Å with the FSC = 0.143 criteria. The FSC between the map and the model is 3.4 Å according to FSC = 0.5 criterion. (B) Local resolution. (C) Zoom-up view of a representative  $\alpha$ -helix that shows clear side chains densities illustrating the quality of the map. (D) The B-factor analysis strongly correlates with the local resolution analysis (B) and shows that the N-terminal hinge and the solvent-exposed region containing residues 242–300 are flexible.

DOI: <https://doi.org/10.7554/eLife.43075.005>

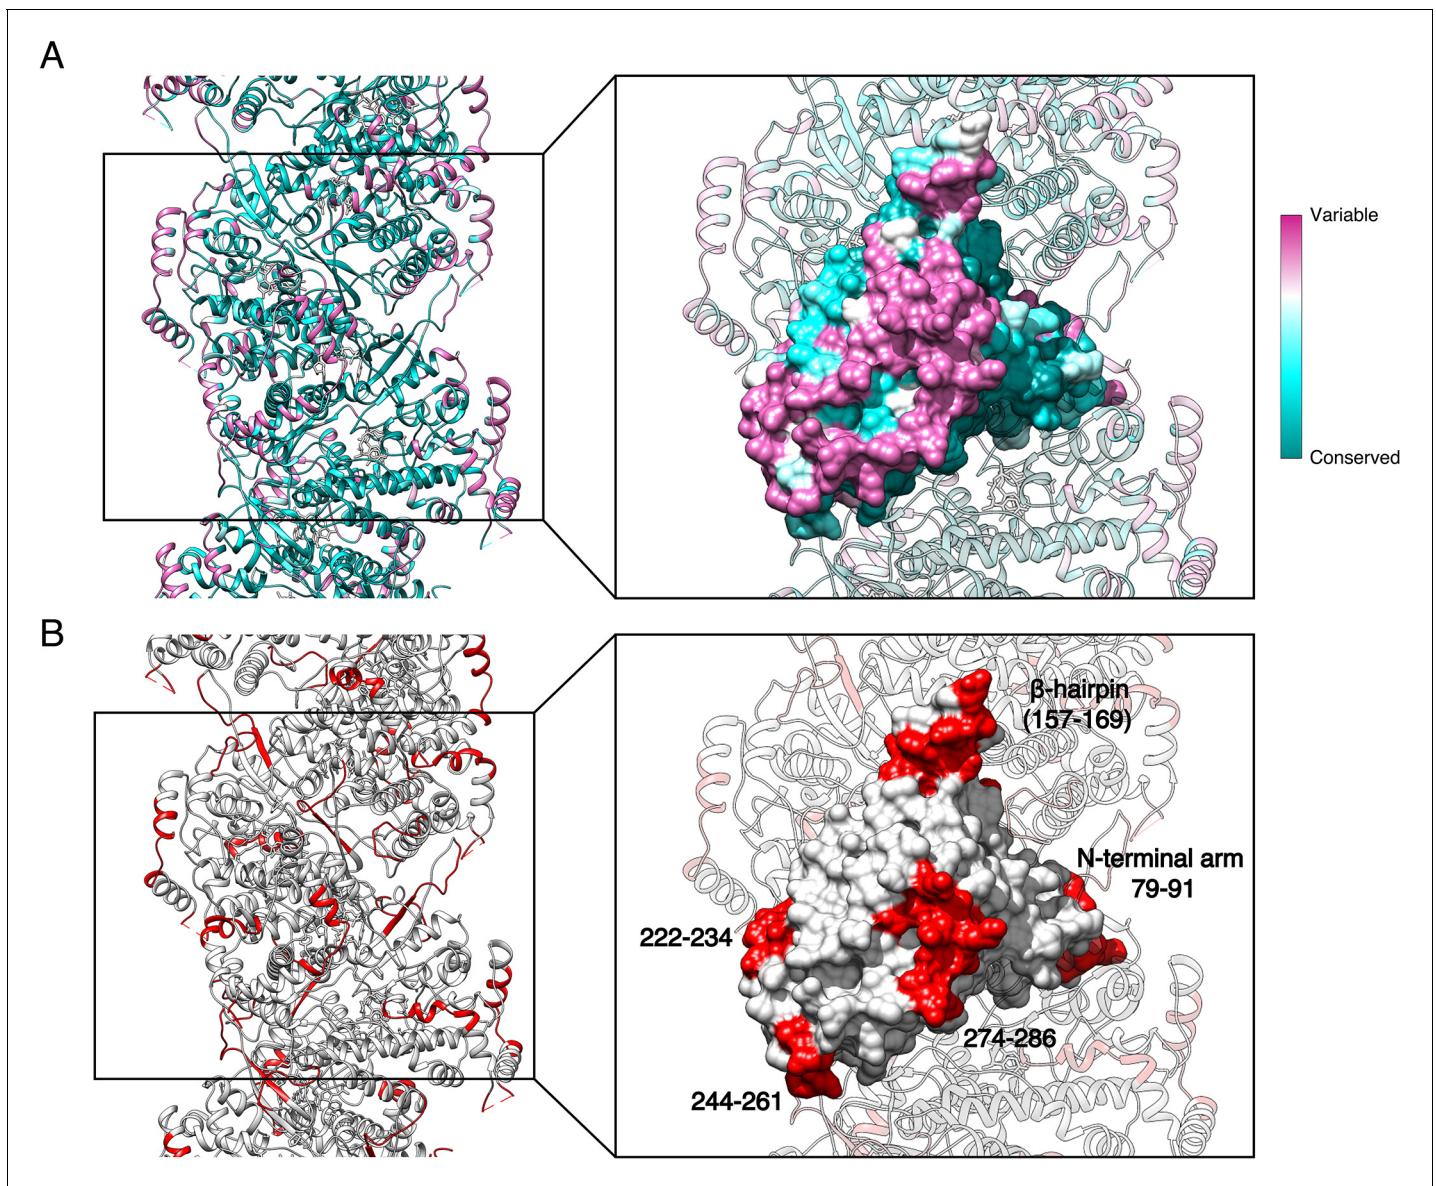

**Figure 1—figure supplement 3.** Specific antigenic sites are localised in variable regions of the NC surface. (A) Surface conservation mapping of HTNV-NC. Regions localised towards NC interior, in particular regions involved in RNA-binding and NP-NP oligomerisation are conserved, whereas HTNV-NC exposed regions are more variable. (B) Epitopes involved in serotype-specific and cross-reactive recognition of HTNV-NC determined in (Tischler *et al.*, 2008) are shown in red. They correspond to surface-exposed regions of HTNV-NC corroborating their necessary accessibility.

DOI: <https://doi.org/10.7554/eLife.43075.006>

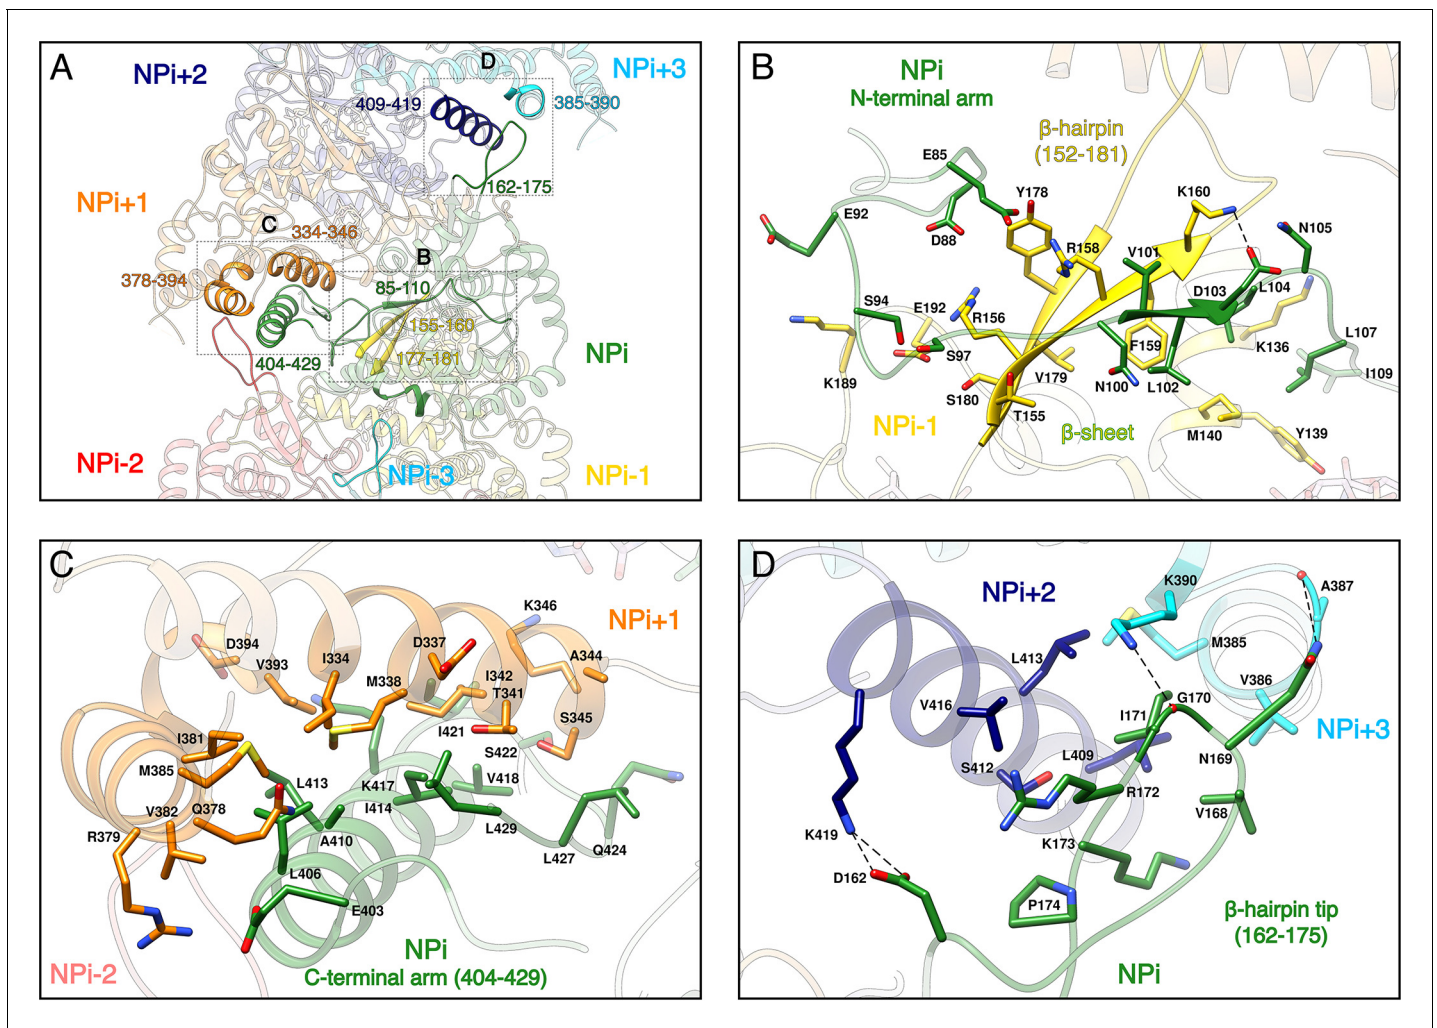

**Figure 2.** NP-NP interactions. (A) General view. The filament orientation corresponds to RNA direction from 5' to 3'. Each NP protomer is coloured differently. Interacting regions of NP<sub>i</sub> with subunits ranging from NP<sub>i-3</sub> to NP<sub>i+3</sub> are shown as non-transparent. Positions of **Figure 2B,C,D** close-up views are indicated with dotted lines. (B) NP<sub>i</sub> Nt<sub>arm</sub> binding site in NP<sub>i-1</sub>. Residues 101–103 from NP<sub>i</sub> Nt<sub>arm</sub> form a β-sheet with β-strands 155–160 and 177–181 from NP<sub>i-1</sub>. Hydrogen bonds are shown as black dotted lines. (C) NP<sub>i</sub> Ct<sub>arm</sub> binding site in NP<sub>i+1</sub>. (D) Binding of NP<sub>i</sub> β-hairpin tip (residues 162–175) on NP<sub>i+2</sub> (residues 409–419) and NP<sub>i+3</sub> (residues 385–390). NP<sub>i</sub> I171 is plugged into a hydrophobic pocket formed by L409 and L413 of the NP<sub>i+2</sub> C-terminal helix and M385 and K390 sidechains of the NP<sub>i+3</sub> C-terminal lobe. Hydrogen bonds between the residue pairs N169–A387 and G170–K390 from NP<sub>i</sub> and NP<sub>i+3</sub> respectively, further stabilise this interaction contributing to the rigidification of HTNV-NC.

DOI: <https://doi.org/10.7554/eLife.43075.009>



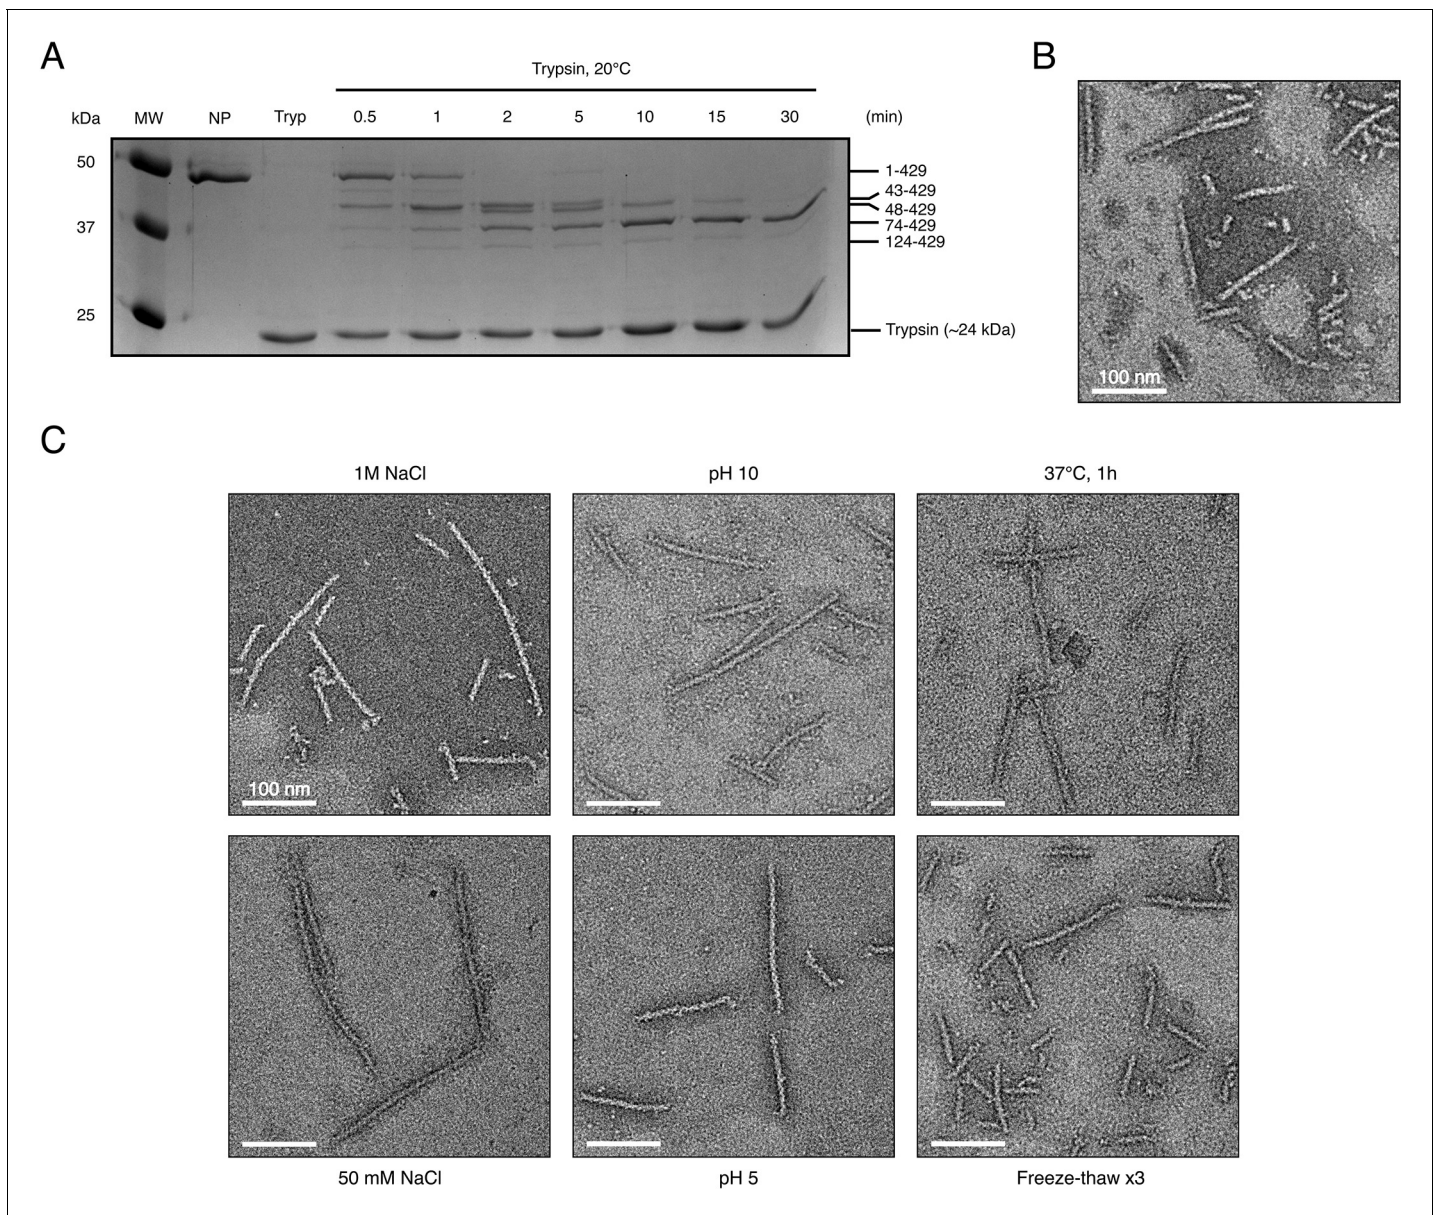

**Figure 2—figure supplement 1.** Limited proteolysis and stability of recombinant HTNV-NCs. (A) SDS-Page analysis of trypsin digested HTNV-NC. MW represents the molecular weight markers. NC were incubated with trypsin (Tryp) at 20°C for different duration from 0 (NP) to 30 min. After 30 min, a stable construct containing residues 74 to 429 is obtained. Presence of intermediate limited proteolysis fragments containing residues 43–429 and 48–429 strongly suggests that the N-terminal residues 1–73 are not disordered and might correspond to a coiled-coil as observed by *Boudko et al. (2007)*. (B) Negative stain EM micrograph of truncated construct NP<sub>74-429</sub> displays NC similar to the ones of full-length NP. (C) Negative stain micrographs of full-length HTNV-NCs incubated in different pHs and salt concentration as indicated. NC fibers stay stable in harsh conditions. Consecutive freeze-thaw breaks NC in small rigid parts. Scale bars are indicated.

DOI: <https://doi.org/10.7554/eLife.43075.010>

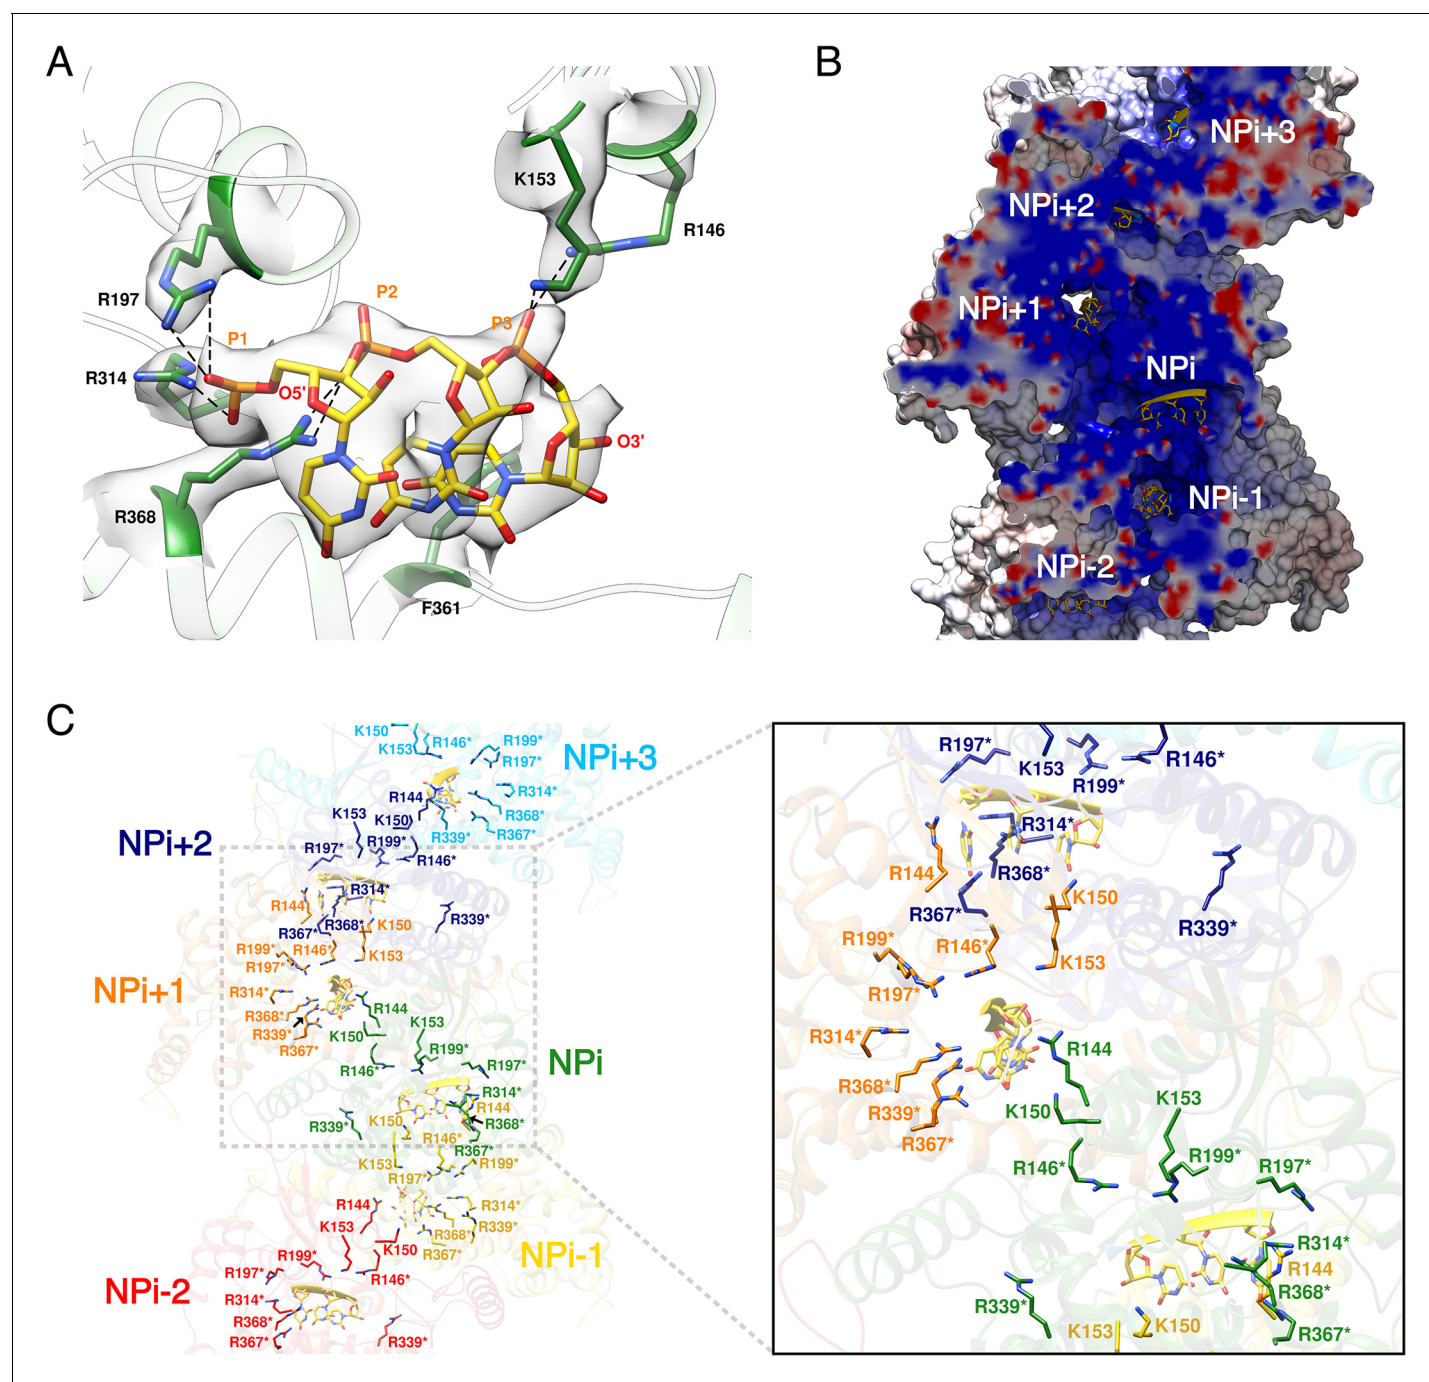

**Figure 3.** HTNV-NC RNA binding site. (A) RNA binding mode of 3 nucleotides. EM density of RNA and RNA-binding residues are displayed in transparent grey. Hydrogen bonds are shown as dotted lines. (B) Cut-away view of NC electrostatic potential showing the continuous positively-charged groove. RNA nucleotides are displayed. (C) RNA-binding residues are shown as sticks and coloured per subunit. RNA-binding residues defined in Guo et al. (2016), namely R146\*, R197\*, R199\*, R314\*, R339\*, R367\*, R368\* are labelled with stars, while RNA-binding residues identified in the present structure, namely R144, K150, K153 are shown without stars.

DOI: <https://doi.org/10.7554/eLife.43075.012>



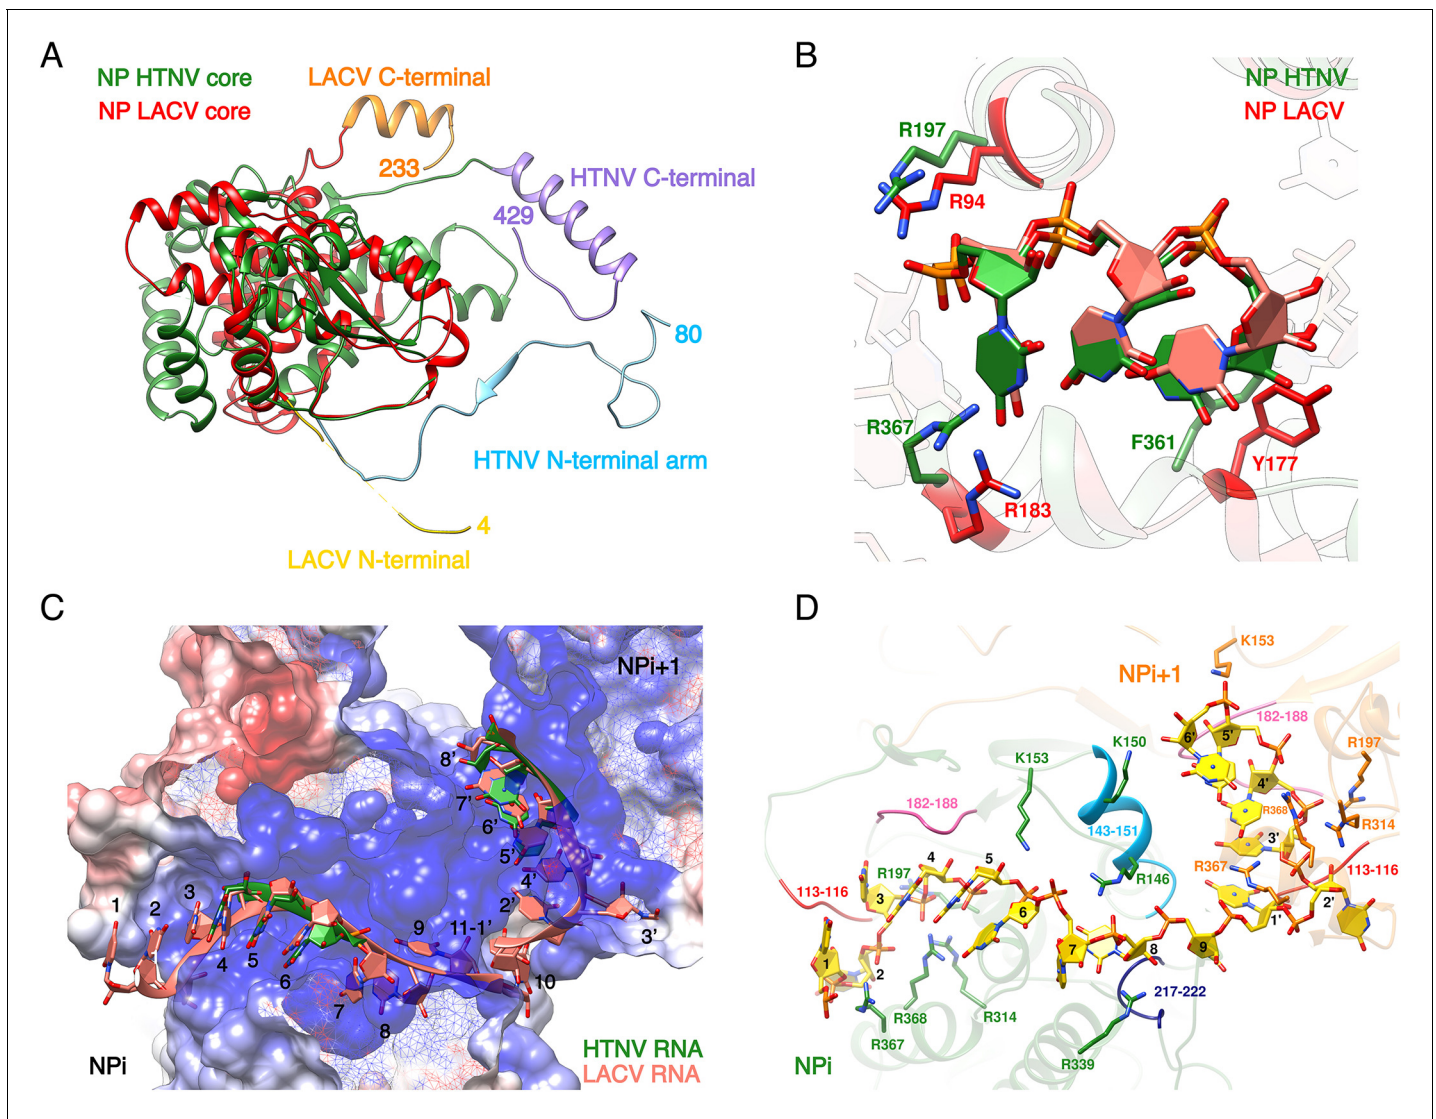

**Figure 3—figure supplement 1.** Comparison of LACV and HTNV-NP/NC, RNA-binding model. (A) Superimposition of HTNV and LACV NP<sub>cores</sub>. HTNV and LACV Nt<sub>arms</sub> and Ct<sub>arms</sub> contain the same secondary structures but LACV arms are significantly shorter and differ in orientation. (B) HTNV-NP-bound nucleotides adopt a similar conformation as LACV-NP-bound nucleotides 5 to 7. The nucleotide binding pocket is conserved in HTNV-NP and LACV-NP. (C) Cut-away view of HTNV-NC electrostatic potential. Visible HTNV nucleotides are shown in green. LACV nucleotides position based on superimposition of LACV and HTNV NP<sub>cores</sub> are shown in salmon. LACV RNA fits reasonably well into HTNV-NC RNA path, however LACV nucleotide 11 from NP<sub>i</sub> clashes with LACV nucleotide one from NP<sub>i+1</sub> showing that each HTNV-NP binds less than 11 nucleotides. LACV nucleotides numbering is indicated. (D) Model of HTNV-NC bound to nine nucleotides. Nucleotides numbering from 1 to 9 is indicated. Residues interacting with riboses and phosphates are shown as sticks. Regions interacting with bases are coloured and specifically labelled.

DOI: <https://doi.org/10.7554/eLife.43075.013>

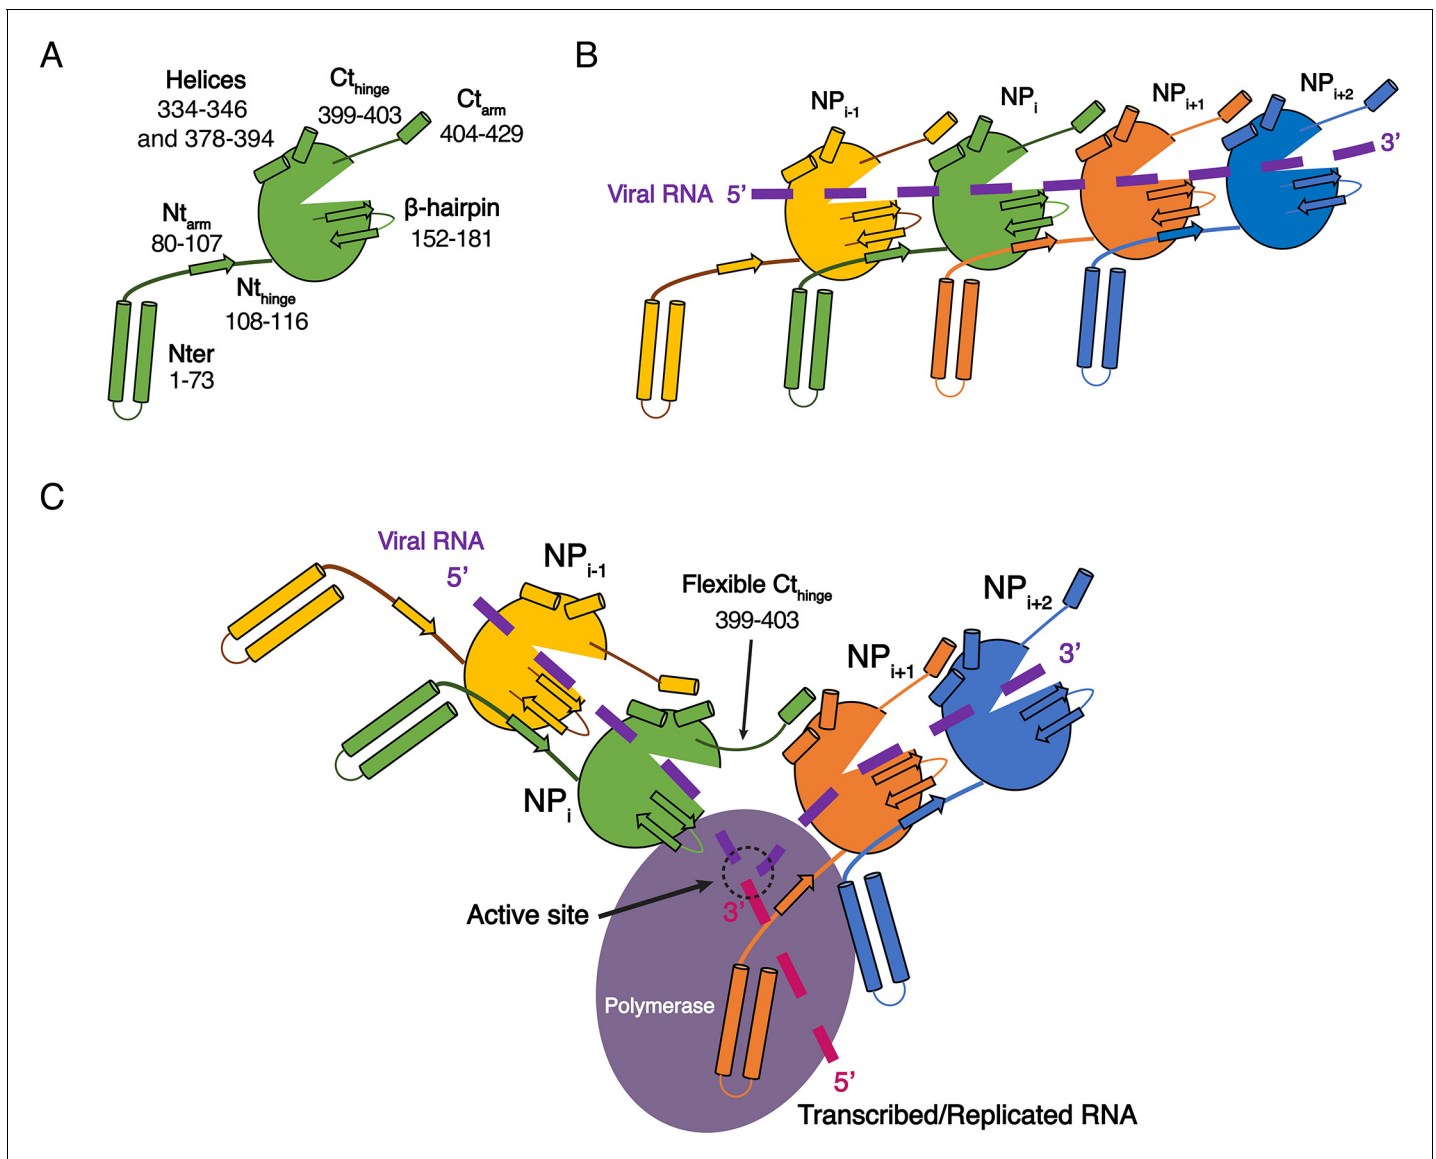

**Figure 4.** Model of HTNV replication and transcription. (A) Schematics representation of HTNV-NP. Major secondary structures involved in interprotomer interactions are represented as arrows for  $\beta$ -strand and cylinders for  $\alpha$ -helices. RNA binding cavity is represented as a clipped part from the NP<sub>core</sub> region (green oval). (B) Schematic representation of RNA binding and NP-NP interactions. RNA is shown as a dotted purple line. Main NP-NP interactions between adjacent subunits are indicated. For clarity, NP<sub>i</sub> interactions with NP<sub>i-2</sub>, NP<sub>i-3</sub>, NP<sub>i+2</sub> and NP<sub>i+3</sub> are absent from the schematic representation. (C) Replication working hypothesis model which is inspired from [Gerlach et al. \(2015\)](#). The polymerase is shown in purple and the newly transcribed/replicated RNA is indicated as a pink dotted line. The model proposes that the polymerase binds to the flexible N-terminal<sub>1-73</sub> region during replication/transcription in order to move along the NC. This would be reminiscent to P and L binding to flexible sNSV C-terminal region. Binding of the polymerase to the N-terminal<sub>1-73</sub> region could destabilise the adjacent Nt<sub>arm</sub> binding. This localised disruption of NP-NP interaction would create a local opening of the NC enabling transient access of the polymerase to few RNA nucleotides for replication/transcription. Such an opening could be possible without disturbing the whole NC as NP to NP contacts are driven not only by the Nt<sub>arm</sub> but also by the Ct<sub>arm</sub>. The Ct<sub>arm</sub> interaction is likely to remain intact even with a local opening of the NC as the C-terminal hinge allows the Ct<sub>arm</sub> to undergo large rotation.

DOI: <https://doi.org/10.7554/eLife.43075.014>
